# Supplementary material
Source: Research Square preprint supplement (doi:10.21203/rs.3.rs-9515764/v1)
Supplement: Supplementary file 1 [file 7cc2cc16d792b35cf38dd3f2.docx]

| Construction | Name and direction | Sequence (5′ ® 3′) | Reference |
| --- | --- | --- | --- |
| pA-gfpOVA | PaspA-insert-FW | AAGCATGCTACCTGAATGGGTTGCGAAT | This study |
| PaspA-insert-RV | AATCTAGACGCTCTCAGAGTGTGAACAC | This study |
| Seq-GFP-FW | TCTCCACTGACAGAAAATTTGTGC | This study |
| pA-TP | TP-vector-FW | GCGCGAGGACCTGAAGTAACTGCAGCCAAGCTTGGCT | This study |
| TP-vector-RV | CTGATCTTTTCTTCATCTTCAAACCCATATGTATATCTCCTTCTTAAATCTAGACGCTCT | This study |
| PaspA-insert-FW | AGAGCGTCTAGATTTAAGAAGGAGATATACATATGGGTTTGAAGATGAAGAAAAGATCAG | This study |
| PaspA-insert-RV | AGCCAAGCTTGGCTGCAGTTACTTCAGGTCCTCGCGC | This study |
| Seq-TP-FW | GCGACTCCTGCATTAGGAAGCAGC | This study |

**Supplementary Table S1. List of primers for plasmid construction**

| **Supplementary Table S2. Primer sets for qRT-PCR** | | | |
| --- | --- | --- | --- |
| qRT-PCR primer description | | Sequence (5′ ® 3′) | Reference |
| dcuS | FW primer | TGCGGTACTGTTCTCGGTGC | This study |
| RV primer | CACTGCCAGTGCCTTGTTGG | This study |
| aspA | FW primer | ATGTCAAACA ACATTCGTAT | This study |
| RV primer | AGTTTTCAATCGCTCTCAGA | This study |
| dcuB | FW primer | AGAAAGGGTGGTATCGCGCT | This study |
| RV primer | CCACCACCGCAATGATAACC | This study |
| frdA | FW primer | GCGCAGGCAAATCCGAATGC | This study |
| RV primer | CATGATCCTGCGCGACAGCG | This study |
| dctA | FW primer | GGTCCTGACAGCGATAGCCA | This study |
| RV primer | CCGCAATGCCCGTTACGACG | This study |
| 16S rRNA | FW primer | CATGCCGCGTGTATGAAGAA | 42 |
| RV primer | CGGGTAACGTCAATGAGCAAA | 42 |


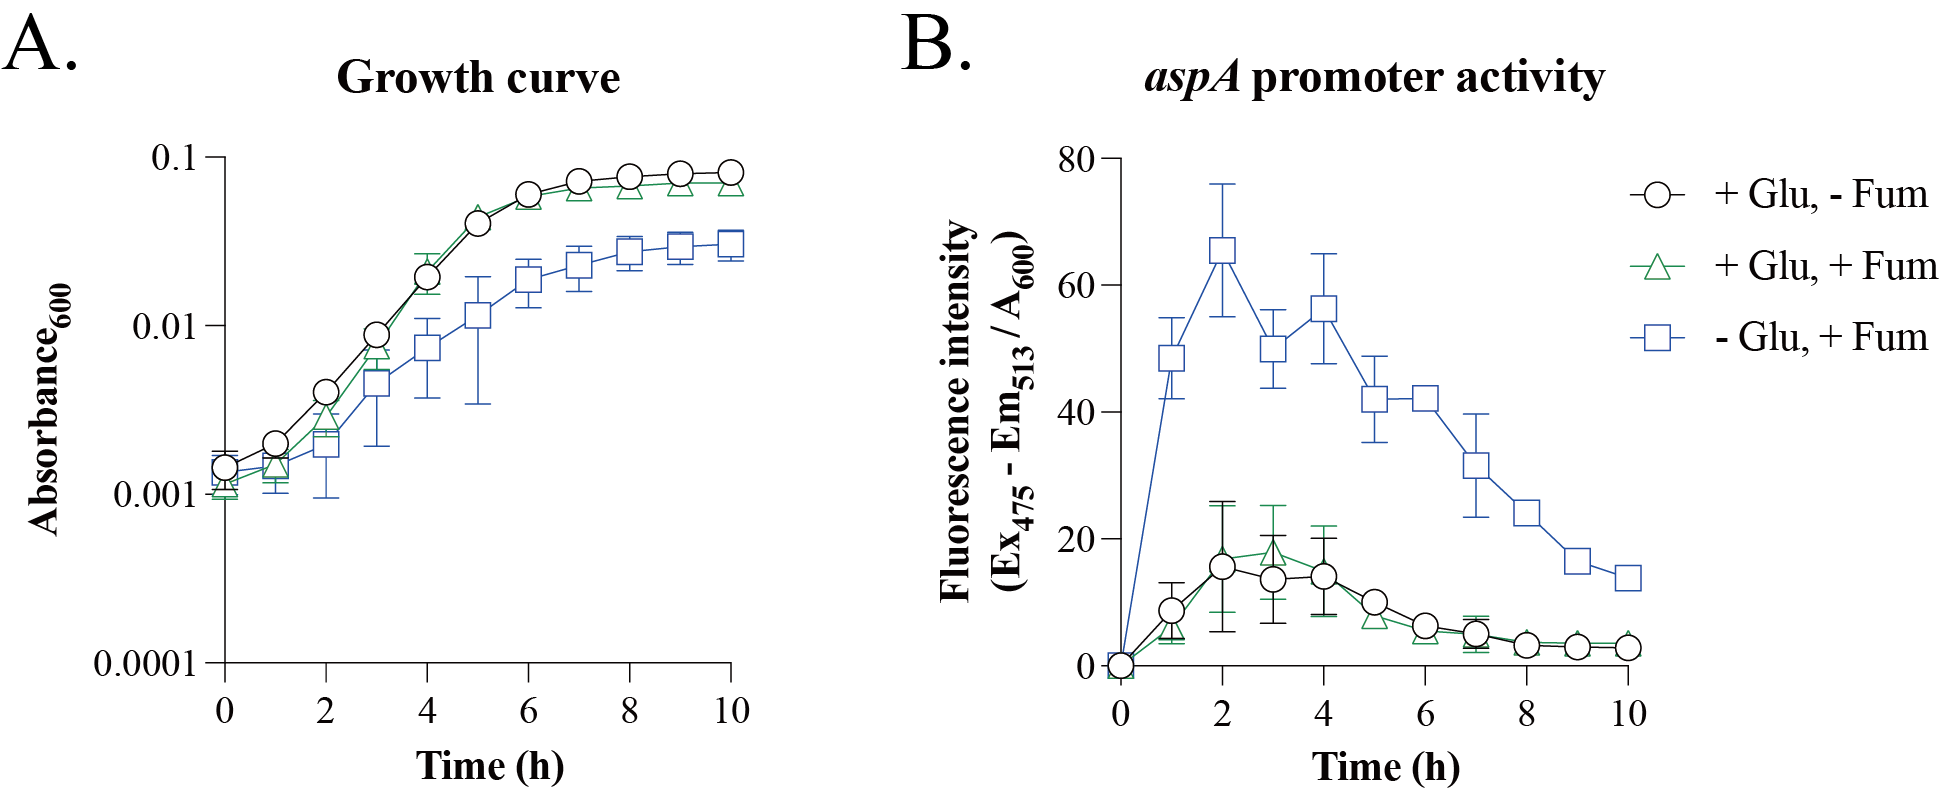
**Supplementary Figure S1. Growth environment-dependent PaspA activity.**

**(A and B)** *E. coli* carrying pA-gfpOVA were cultured in M9 medium supplemented with the indicated carbon source in an anaerobic bag. **(A)** Bacterial growth was monitored by measuring the absorbance at 600 nm hourly. **(B)** *aspA* promoter activity was evaluated by utilizing an unstable variant of green fluorescent protein (gfpOVA), with fluorescence detected at excitation and emission wavelengths of 488 nm and 513 nm, respectively. Fluorescence intensity was normalized to absorbance at 600 nm.


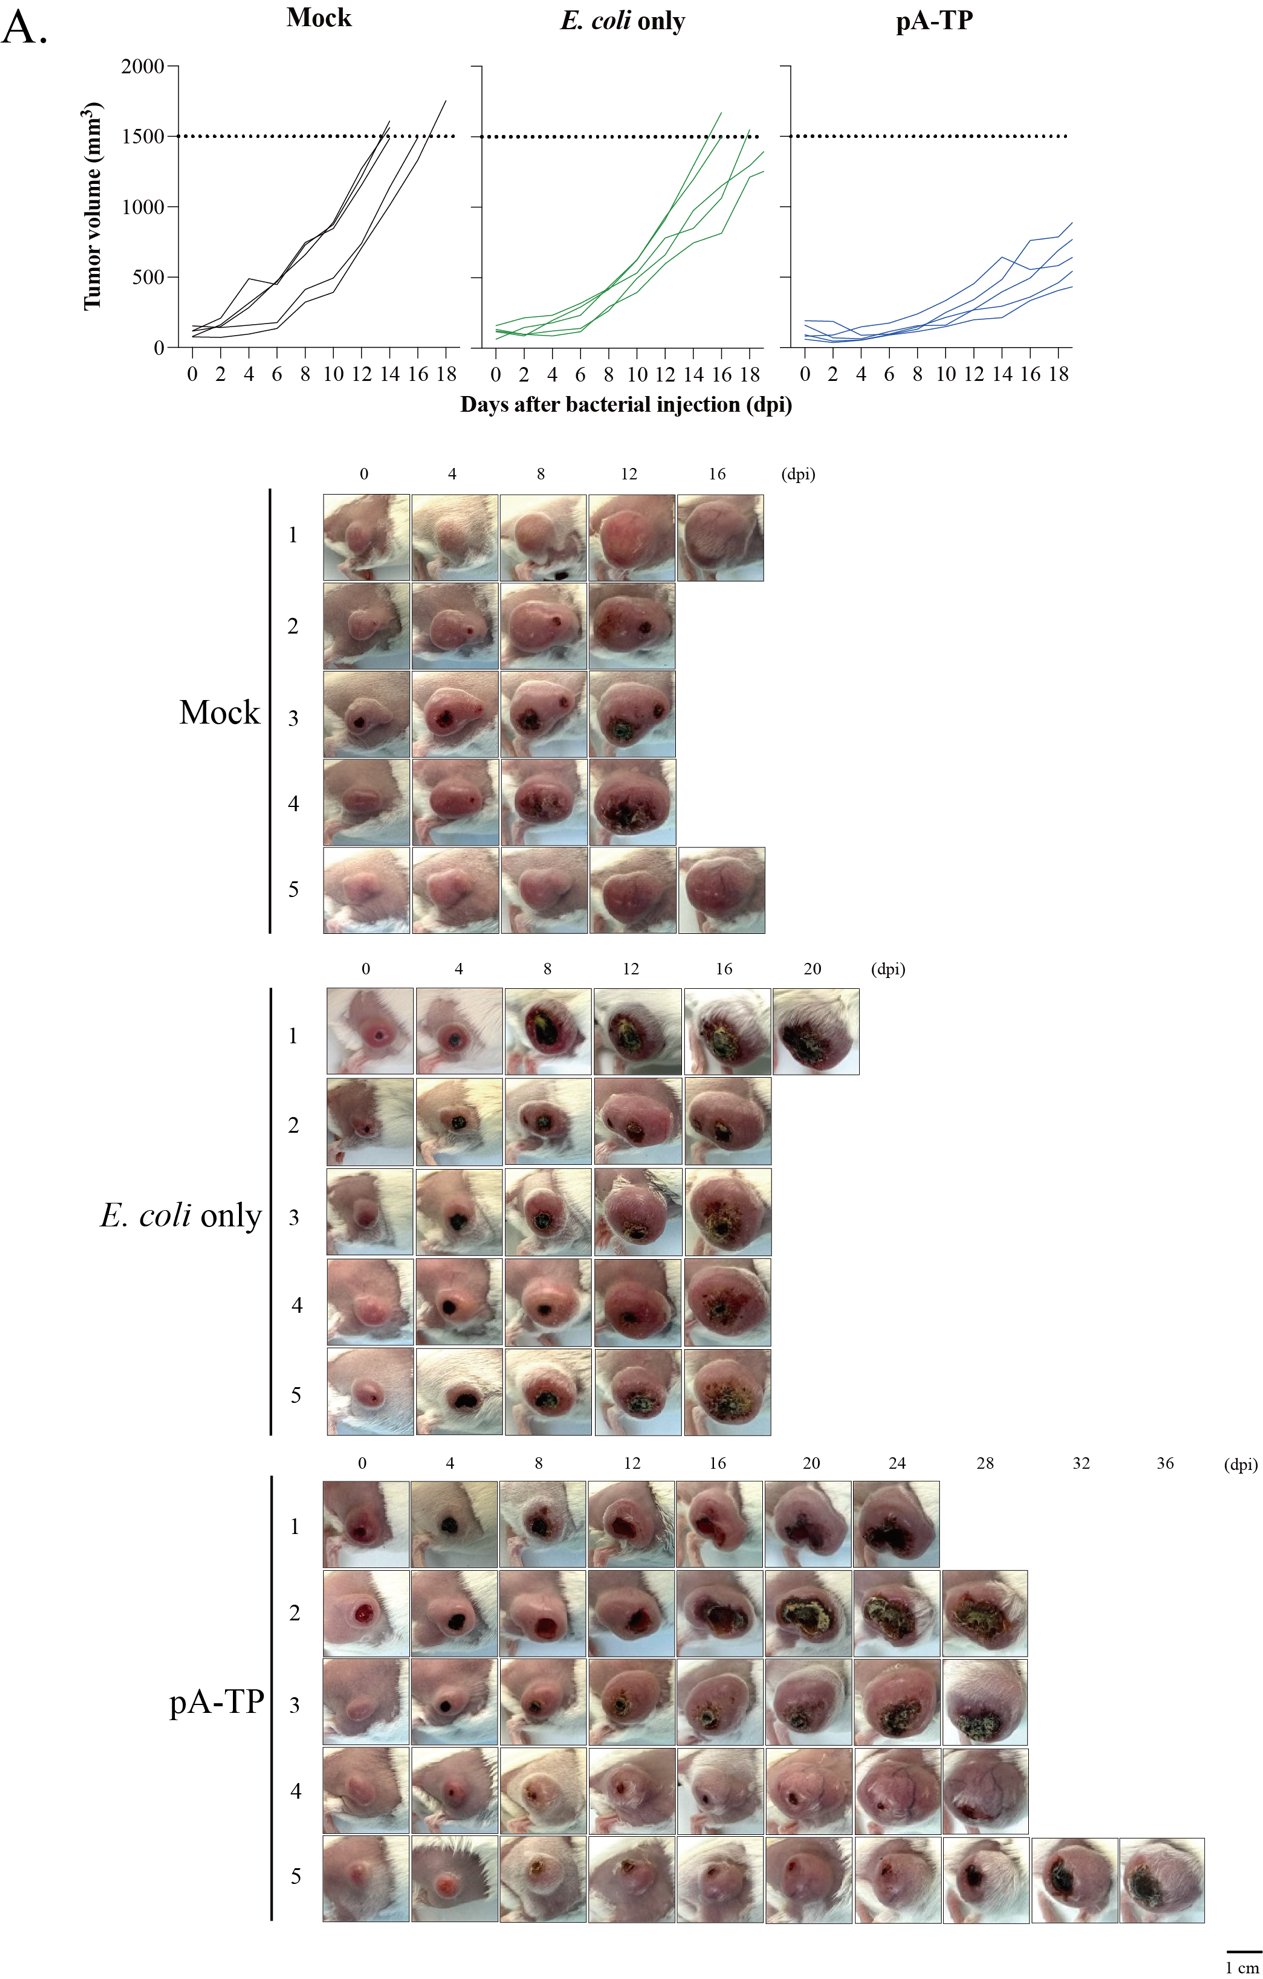


**Supplementary Figure S2. Complete set of tumor-bearing mouse images expanded from those shown in Figure 4B.** BALB/c mice were subcutaneously implanted with 1 × 106 CT26 colon carcinoma cells on the right thigh.CT26 tumor-bearing mice were intravenously injected with PBS (Mock; black line), wild-type *E. coli* (*E. coli* only; green line), or MDG003 (pA-TP; blue line) (n = 5 per group; 108 CFU/mouse) when the tumor size was 100–150 mm3.


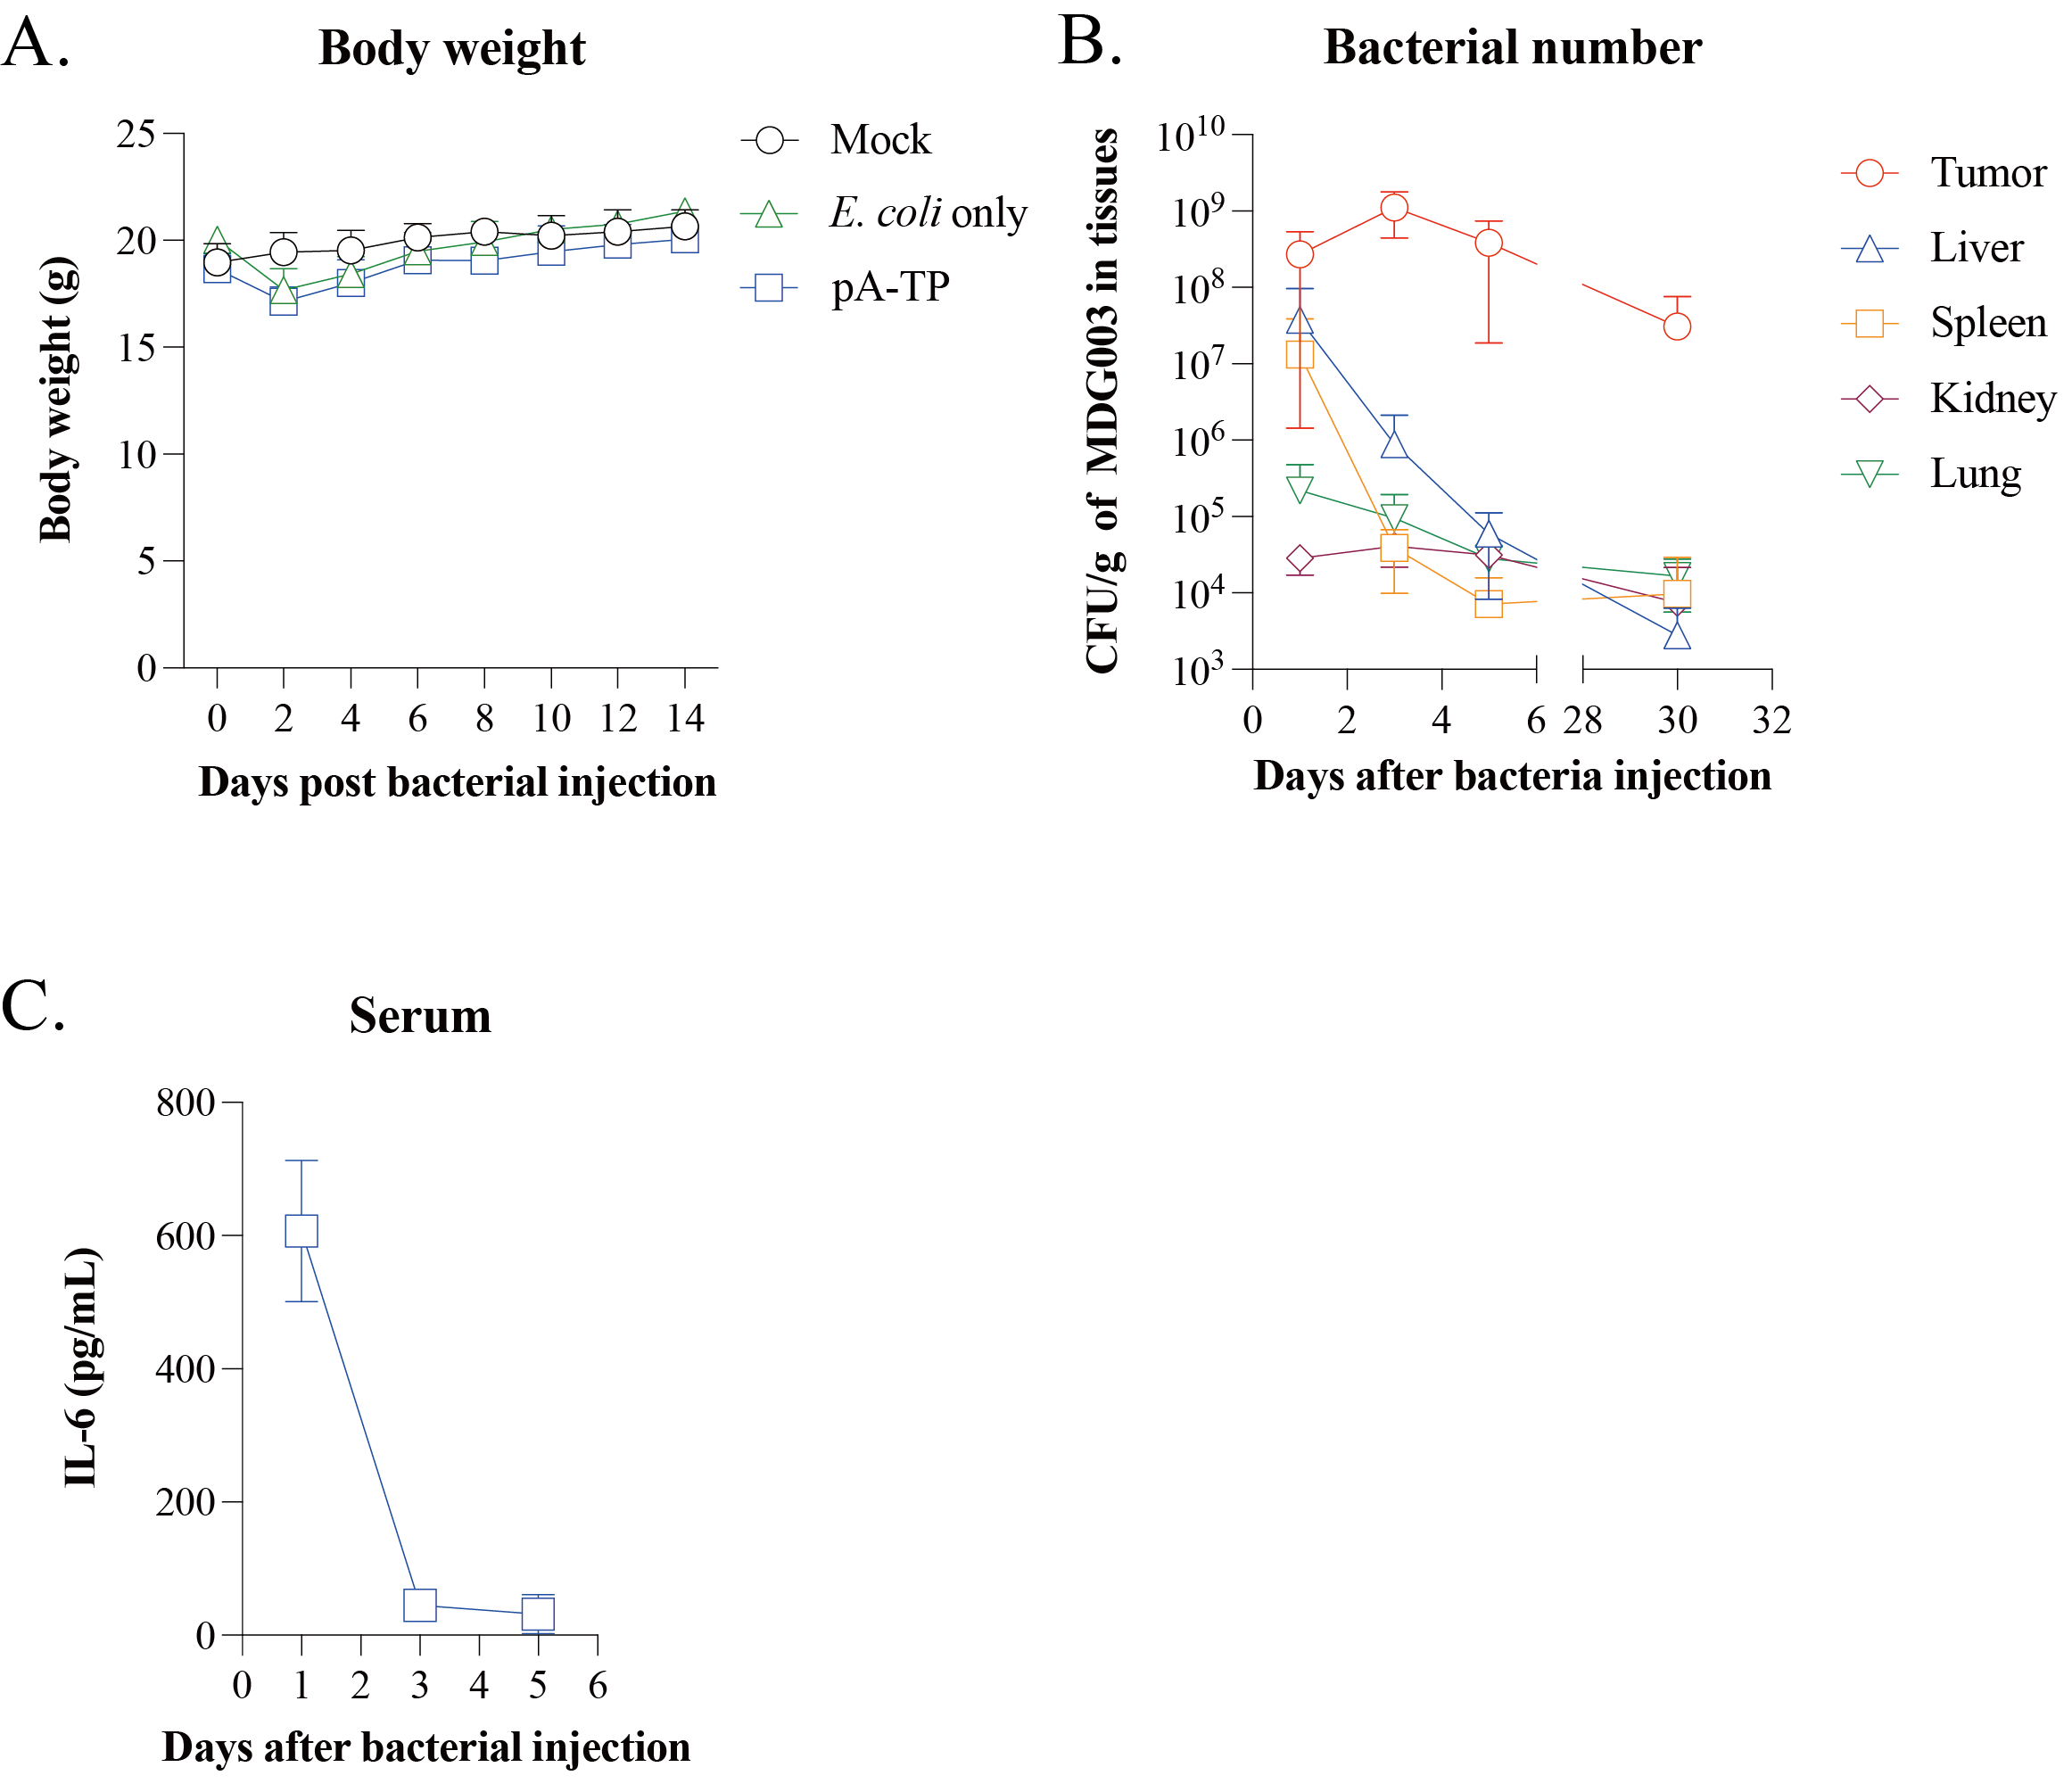


**Supplementary Figure S3. Assessment of the host response upon bacterial injection.**

**(A–C)** BALB/c mice were subcutaneously implanted with 1 × 106 CT26 colon carcinoma cells on the thigh. To assess the toxicity of bacterial injection, CT26-bearing BALB/c mice were treated with PBS (Mock; black line circle), wild-type *E. coli* (*E. coli* only; green line triangle), or MDG003 (pA-TP; blue line square) by intravenous injection at a dose of 1 × 108 CFU/mouse when the tumor size was 100–150 mm3. **(A)** The body weight changes in mice grafted with CT26 were measured every 2 days after bacterial injection. **(B)** Bacterial counts were measured at 1, 3, 5, and 30 dpi in the described tissue. **(C)** The serum cytokine level was measured at the indicated days.

**Supplementary Figure S4. Assessment of the plasmid stability *in vivo*.**

BALB/c mice were subcutaneously implanted with 1 × 106 CT26 colon carcinoma cells on the thigh. To assess the toxicity of bacterial injection, CT26-bearing BALB/c mice were treated with MDG003 by intravenous injection at a dose of 1 × 108 CFU/mouse when the tumor size was 100–150 mm3. Bacterial counts were measured at 1, 3, and 5 dpi in the tumor tissue. To assess plasmid stability, recovered bacteria were plated on both non-selective LB agar and antibiotic-containing LB agar. Plasmid-bearing fraction was calculated as the percentage of CFUs grown on amp-containing plates relative to total CFUs grown on non-selective LB plates.
